# Supplementary material for: Total Synthesis and Anti-Viral Activities of an Extract of Radix isatidis
Source: MDPI journal article supplement (doi:10.3390/molecules191220906), 2014-12-12

## Supplementary Materials

**Figure S1.** MS of compound **6**.

Spectrum from DataSET15.wiff (sample 1) - Sample...S (100 - 1000) from 0.141 min, Gaussian smoothed

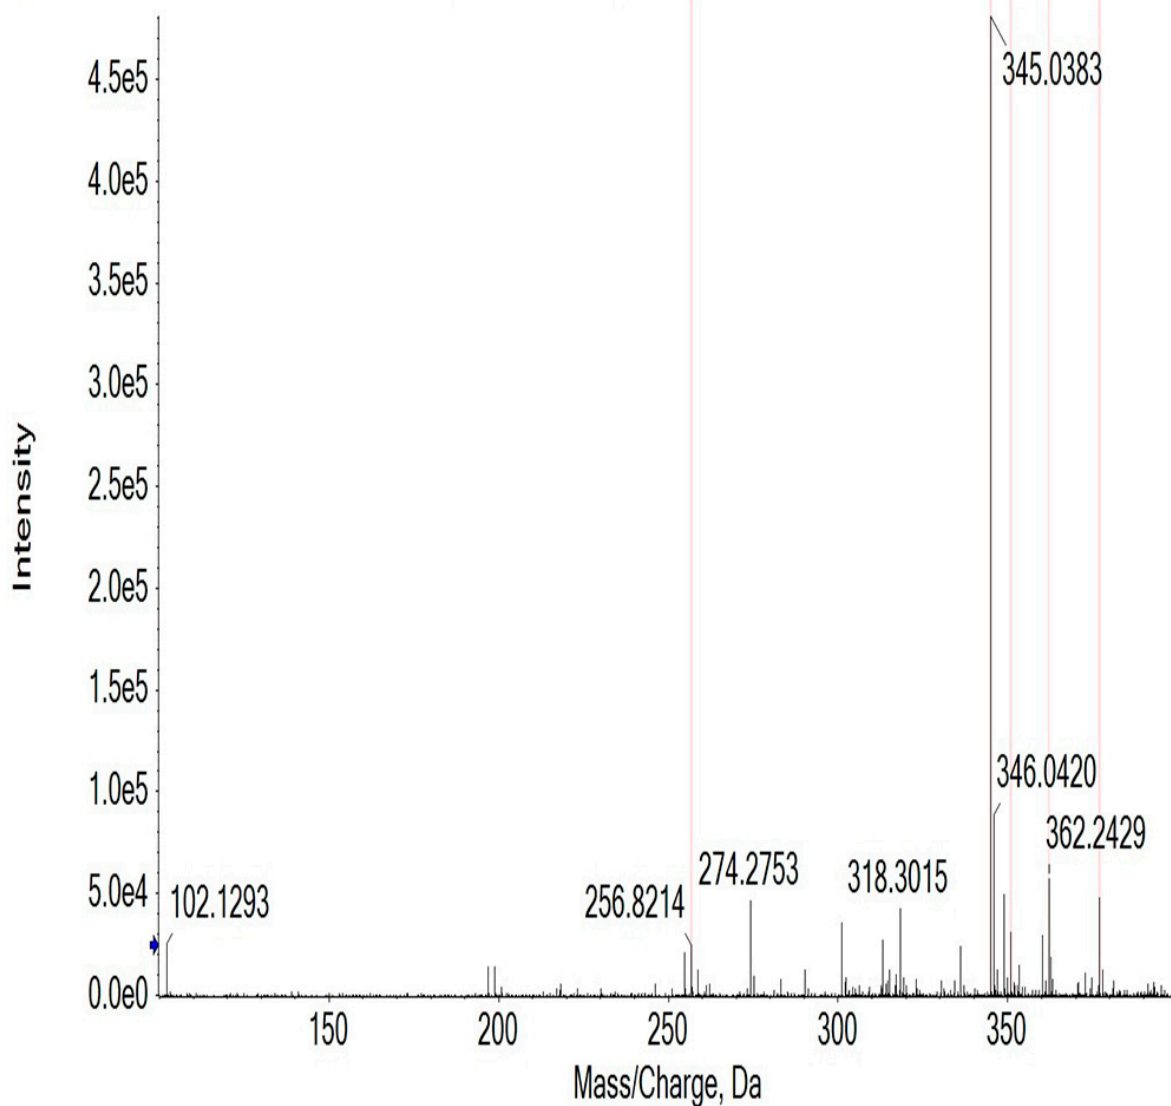

Figure S2. NMR of compound 6.

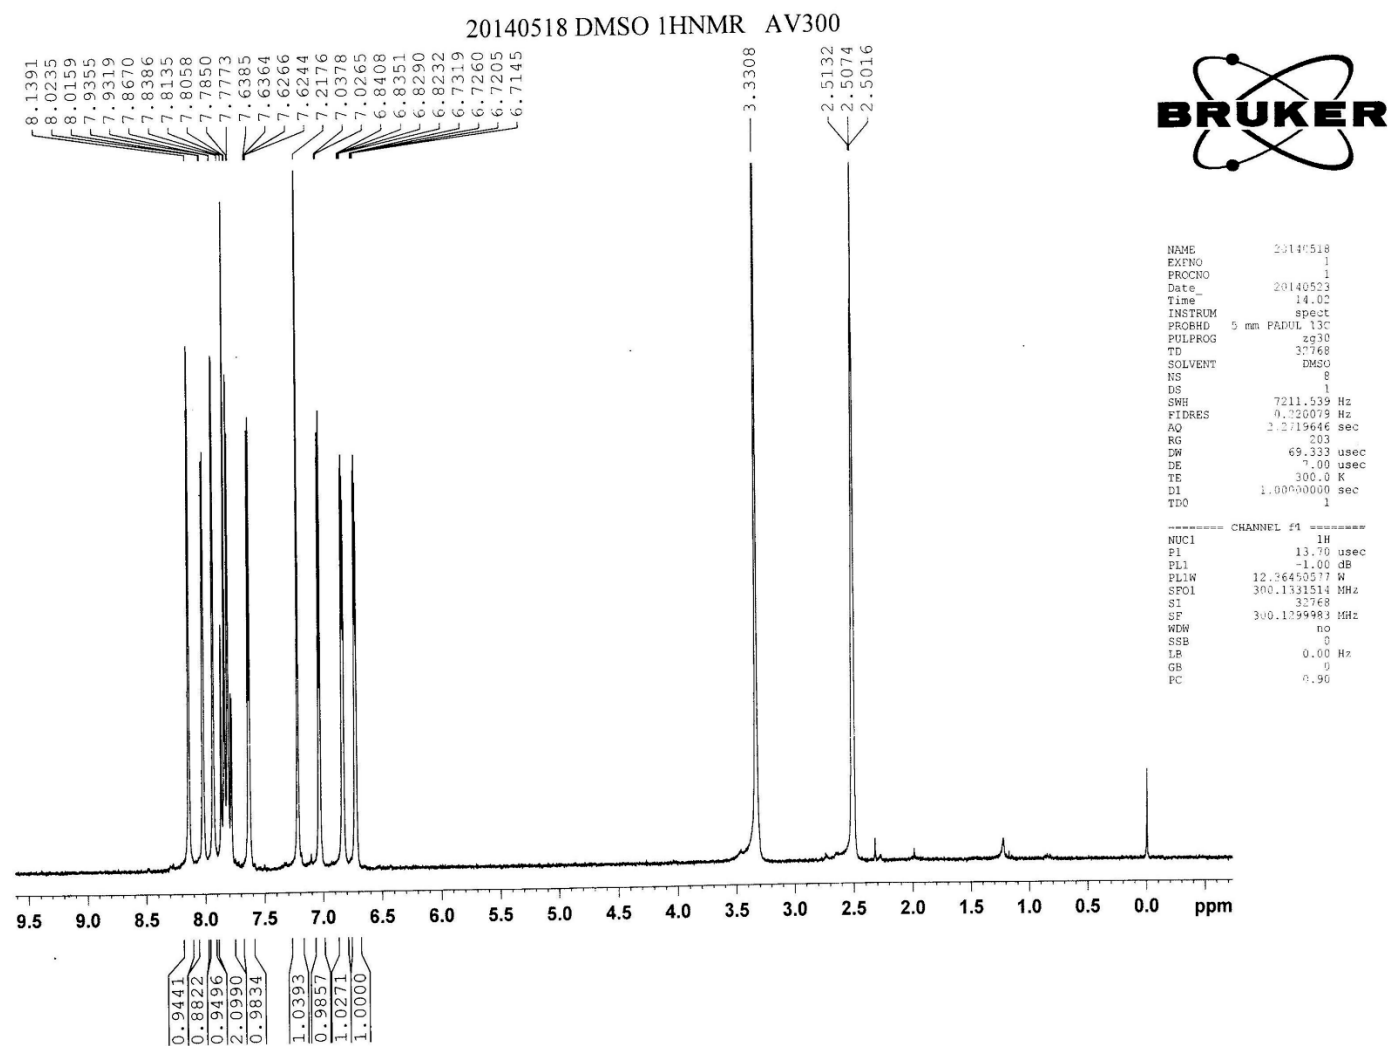

**Figure S3.** MS of compound 7.

Spectrum from DataSET27.wiff (sample 1) - Sample...xperiment 1, +TOF MS (100 - 1000) from 0.138 min

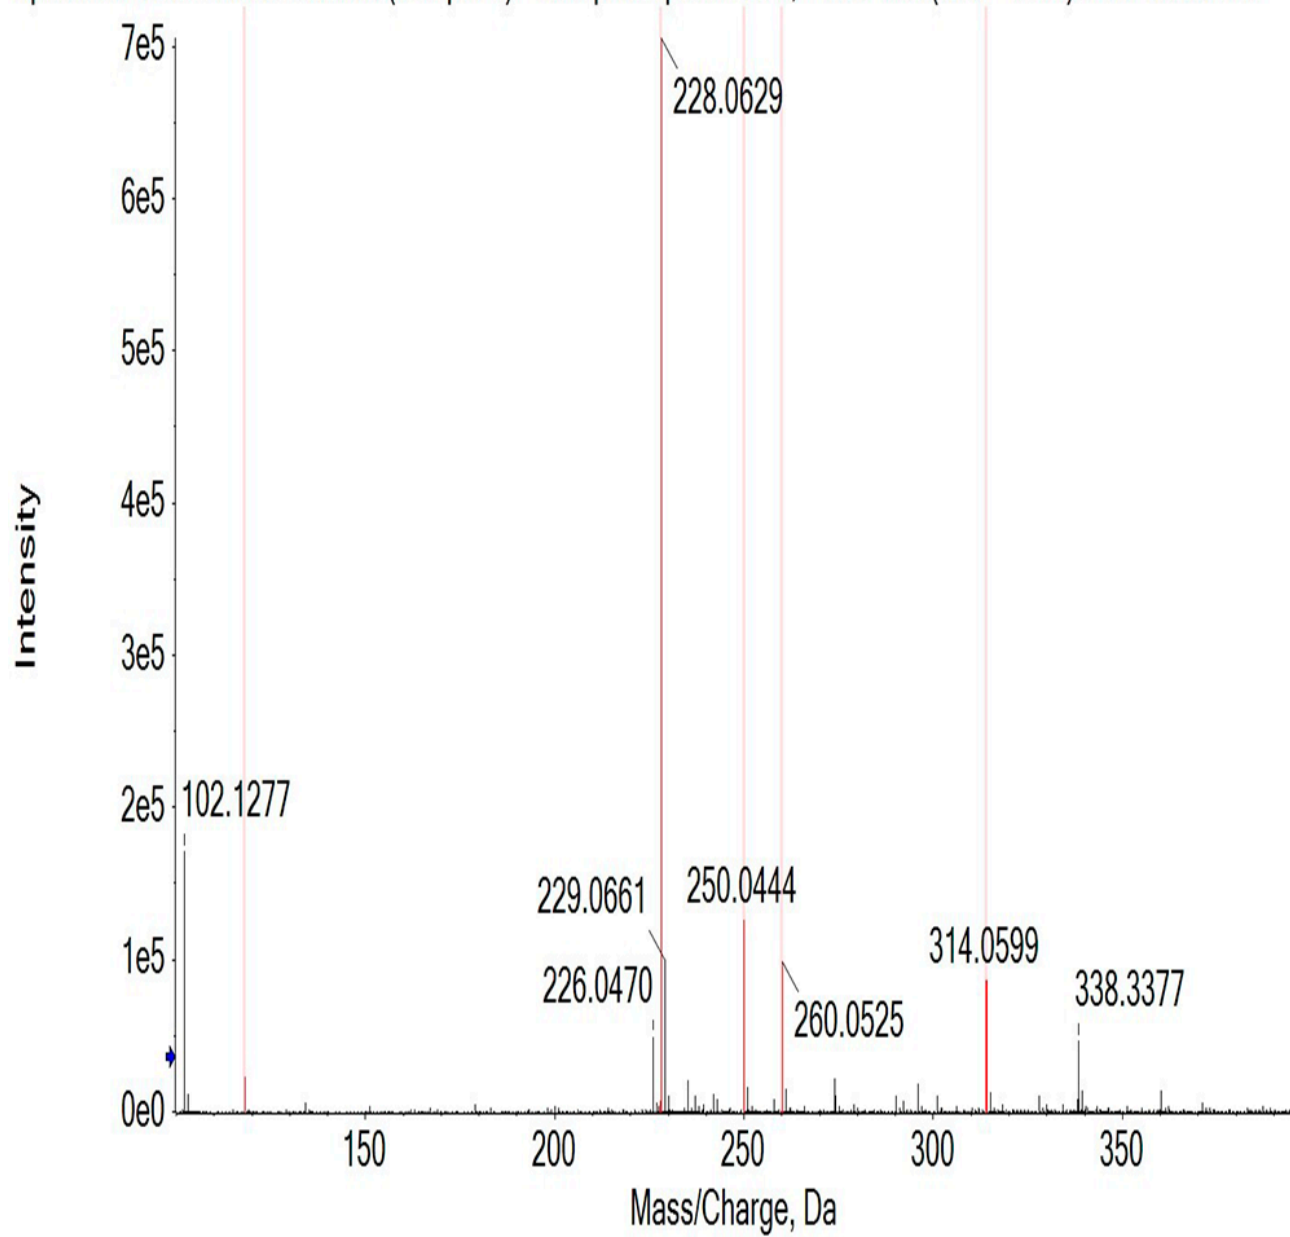

Figure S4. NMR of compound 7.

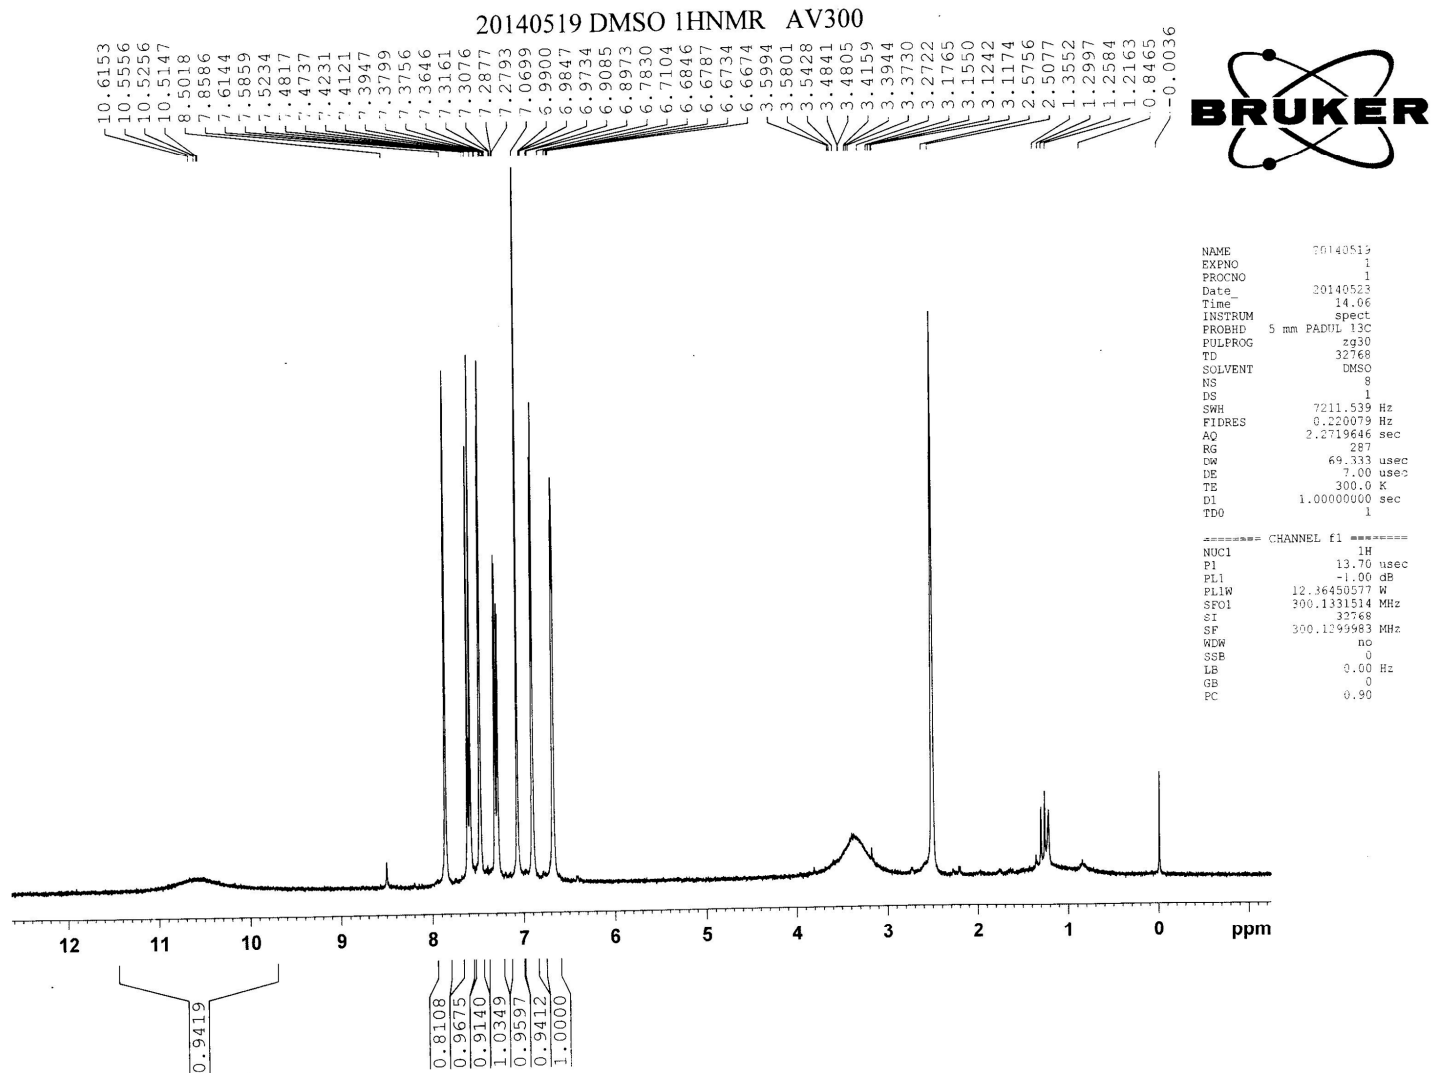

**Figure S5.** MS of compound **8**.

Spectrum from DataSET18.wiff (sample 1) - Sample...xperiment 1, +TOF MS (100 - 1000) from 0.149 min

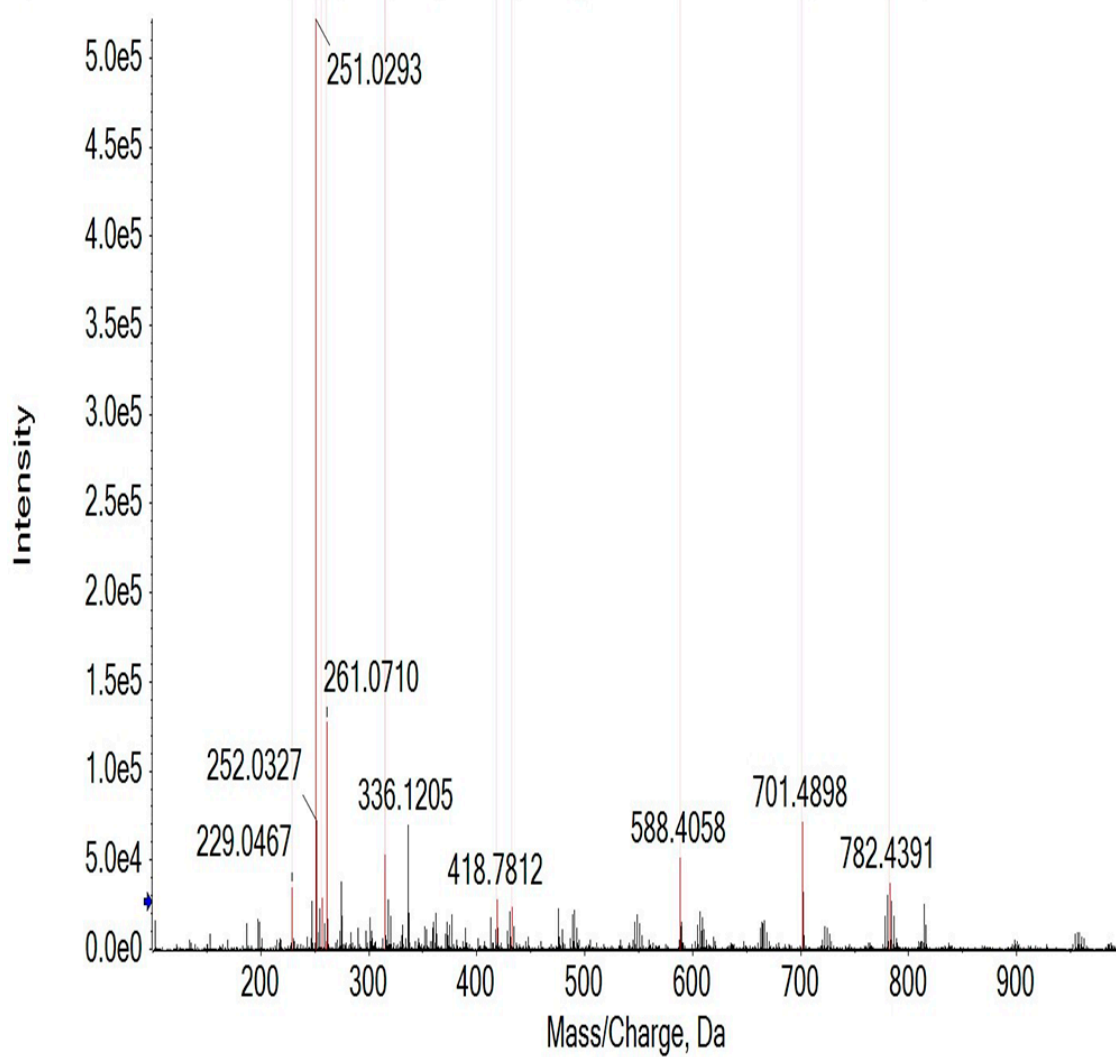

Figure S6. NMR of compound 8.

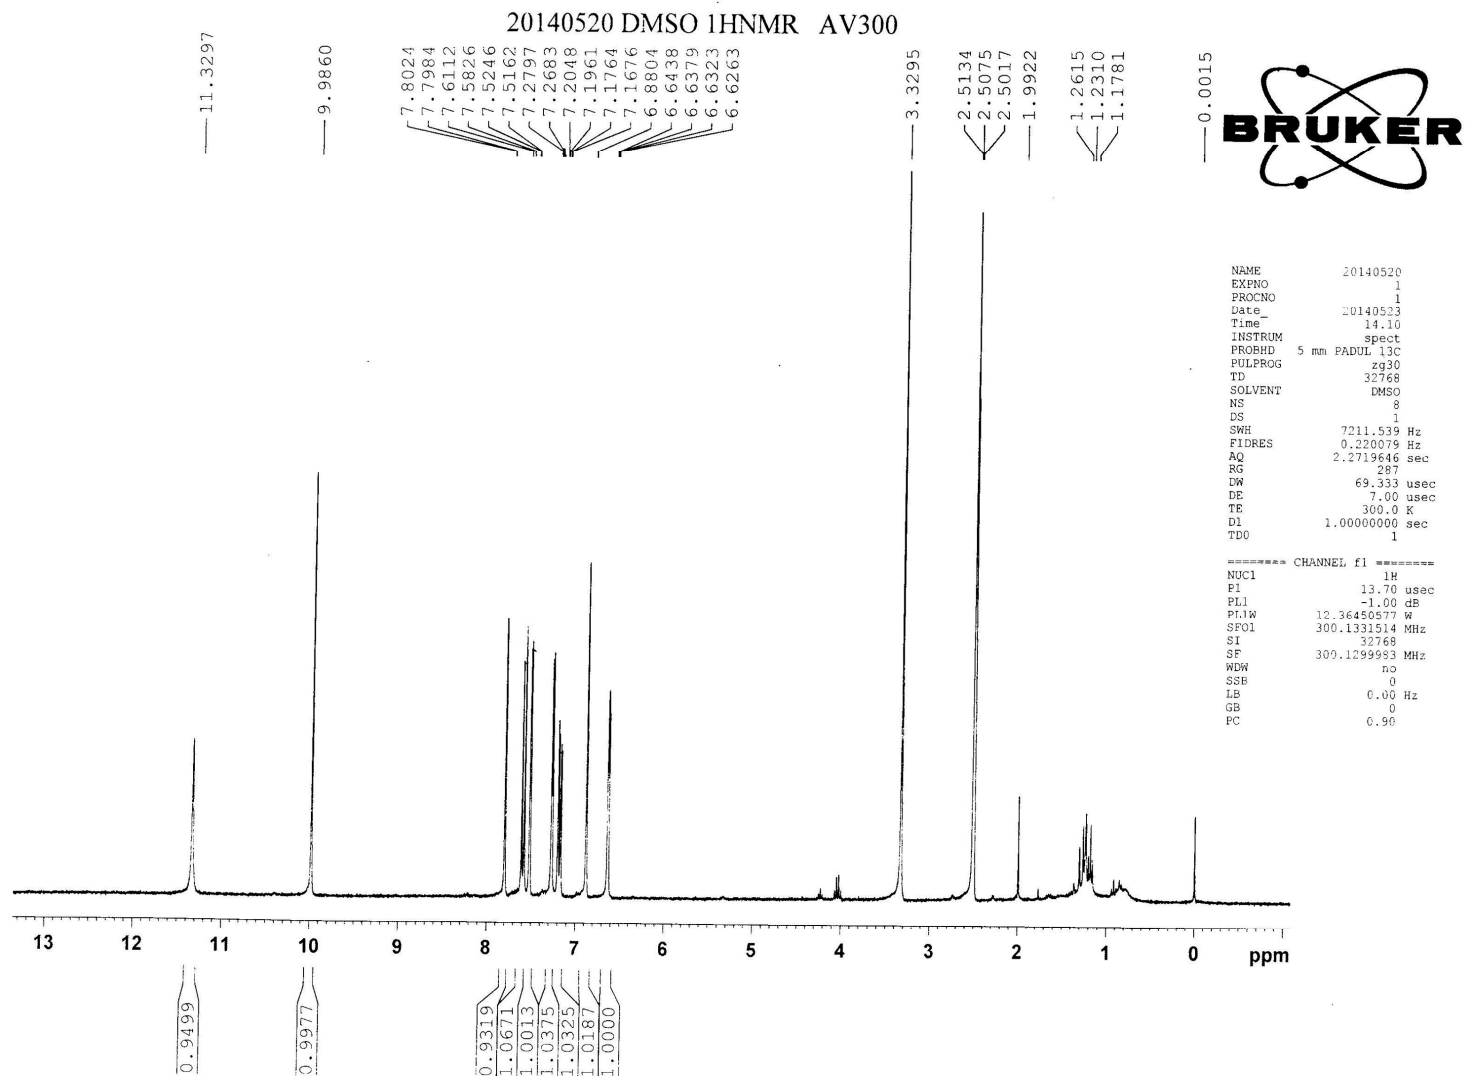

Supplement: s1 [file s1]
